1 **Inhibition of a negative feedback for persistent epithelial cell–cell junction**

2 **contraction by p21-activated kinase 3**

3

4 **Authors:** Hiroyuki Uechi and Erina Kuranaga\*

5

6 **Affiliations:** Laboratory for Histogenetic Dynamics, Graduate School of Life Sciences,

7 Tohoku University, 6-3, Aramaki-aza-aoba, Aoba-ku, Sendai 980-8578, Japan

8

9 \*Corresponding author ([erina.kuranaga.d1@tohoku.ac.jp](mailto:erina.kuranaga.d1@tohoku.ac.jp))

10

11

12 **Abstract**

13 Actin-mediated mechanical forces are central drivers of cellular dynamics. They generate  
14 protrusive and contractile dynamics, the latter of which are induced in concert with myosin II  
15 bundled at the site of contraction. These dynamics emerge concomitantly in tissues and even  
16 each cell; thus, the tight regulation of such bidirectional forces is important for proper cellular  
17 deformation. Here, we show that contractile dynamics can eventually disturb cell–cell junction  
18 contraction in the absence of p21-activated kinase 3 (Pak3). Upon Pak3 depletion, contractility  
19 induces the formation of abnormal actin protrusions at the shortening junctions, which reduces  
20 E-cadherin levels at adherens junctions. Such E-cadherin dilution dissociates myosin II from  
21 the contracting junctions, leading to a reduction in junctional tensile forces. Overexpressing E-  
22 cadherin restores the association of myosin II at the junctions and junction contraction. Our  
23 results suggest that contractility both induces and perturbs junction contraction and that the  
24 attenuation of such perturbations by Pak3 facilitates persistent junction shortening.

25

26

27 The cell collectives composing animal bodies sculpt tissue architectures through various  
28 cellular behaviors such as cell division, deformation, rearrangement, and migration. The  
29 cytoskeletal protein actin is the central protein that drives these cellular behaviors by generating  
30 mechanical forces<sup>1-7</sup>. While actin generates protrusive forces by forming branched and bundled  
31 structures, it also supplies contractile forces by forming bundled structures and loosely  
32 organized networks in concert with non-muscle myosin II. Such bidirectional force generation  
33 by actin can coexist in each cell and even at the same position within cells. During single-cell  
34 migration, protrusive actin dynamics extend cells at the leading edge, while actomyosin (the  
35 actin and myosin II complex) contraction causes retraction at the rear of the cell along the  
36 migrating direction<sup>8,9</sup>. A recent study of *Drosophila* eye development demonstrated that  
37 pulsatile extension by protrusive branched actin networks and counterbalancing actomyosin  
38 contractility-mediated shortening of each cell–cell contact control cellular shape<sup>10</sup>. Thus, the  
39 tight regulation of actin dynamics is important for proper force induction and the resultant  
40 cellular dynamics.

41       Epithelial cell intercalation is one of the multicellular dynamics driven by the  
42 contractile forces of actomyosin and contributes to directional tissue extension and  
43 movement<sup>11-13</sup>. This process consists of the directional exchange of cellular positions within

44 cell collectives, which is driven by cell–cell junction remodeling (i.e., shortening of cell–cell  
45 junctions and subsequent growth of new ones in new directions)<sup>14</sup>. During shortening, actin  
46 and myosin II are highly enriched at the adherens junctions (AJs) of cell–cell junctions to form  
47 contractile actomyosin bundles that then shorten the junctions<sup>1,11,15–19</sup>. The mechanisms  
48 inducing contractile forces via actomyosin are well studied; however, it is still unknown  
49 whether actomyosin-mediated contractions are negatively affected during cell–cell junction  
50 shortening, and if so, how the shortening is sustained.

51           The rotation of *Drosophila* male genitalia is an example of epithelial cell  
52 intercalation<sup>20</sup>. During metamorphosis, male genitalia located at the posterior end of the body  
53 undergo 360° dextral rotation around the anterior–posterior axis (Fig. 1a)<sup>21,22</sup>. This rotation is  
54 observed from 24 to 36 h after puparium formation (APF), and is composed of two movements  
55 of epithelial cells: the initial 180° dextral movement of the genitalia along with the surrounding  
56 epithelia, which is called the posterior compartment of the A8 segment (A8p), at the anterior  
57 side of the genitalia, and the subsequent 180° dextral movement of the anterior compartment  
58 of the A8 segment (A8a), the latter of which starts at 26 h APF<sup>20–22</sup>. During rotation, the A8a  
59 cells frequently induce left–right polarized junction remodeling in relation to the anterior–  
60 posterior axis in the confined space between the A8p epithelia and the A7 segment, which

61 results in unidirectional epithelial cell movement<sup>20,23</sup>. Consistent with other tissues, the  
62 accumulation of actomyosin at the AJs of cell–cell junctions induces junction contraction in  
63 this model. Down-regulation of contractile activity, such as via RNA interference (RNAi) of  
64 myosin II regulatory light chain (MRLC), compromises the remodeling and hence results in  
65 insufficient A8a cell movement, leading to incomplete rotation of the genitalia<sup>20</sup>.

66         Here, we examined actin and myosin II dynamics in the A8a epithelia during the  
67 rotation of *Drosophila* genitalia and revealed that, upon junction contraction, actin dynamics  
68 at cell–cell junctions are compromised in p21-activated kinase 3 (Pak3) mutant flies. These  
69 aberrant actin dynamics disturb the distribution of E-cadherin and myosin II at the junctions,  
70 and thus eventually disrupt the junction contraction. These findings suggest that Pak3 blocks  
71 the negative feedback of contractility and ensures persistent junction contraction and  
72 rearrangement of epithelial cells.

73

## 74 **Results**

75 **Pak3 is required for A8a cell movement during the rotation of *Drosophila* genitalia.** To  
76 understand the molecular basis underlying epithelial cell–cell junction remodeling, we  
77 searched for genes involved in the movement of A8a cells. In the control flies, time-lapse

78 images showed that male genitalia underwent the 360° full rotation during metamorphosis, and  
79 all male flies had the normal orientation of genitalia (Fig. 1a,b). We found that RNAi targeting  
80 Pak3 in the A8a epithelia under the control of the *AbdB-Gal4* driver caused insufficient  
81 movement of the A8a epithelia during rotation, while the genitalia still underwent the 180°  
82 movement with respect to the A8a epithelia (Fig. 1a)<sup>24,25</sup>. In addition, depleting Pak3 induced  
83 the misorientation of genitalia in approximately 60% of adult male flies, similar to that reported  
84 for MRLC depletion (Fig. 1b)<sup>20</sup>. Co-expression of Dicer2, which augments RNAi efficiency<sup>26</sup>,  
85 with Pak3 RNAi increased the frequency of misorientation to > 90%, which was associated  
86 with a decline in rotation angle, while the overexpression (OE) of Pak3 tagged with green  
87 fluorescent protein (Pak3::GFP) restored the normal orientation, excluding the possibility of  
88 an off-target effect of this Pak3 RNAi (Fig. 1b). These results indicate that Pak3 is involved in  
89 epithelial tissue dynamics.

90           Immunostaining of fixed epithelia revealed that Pak3 was expressed in the A8a cells,  
91 as indicated by its decreased signals in Pak3 RNAi cells that were clonally introduced into  
92 wild-type tissues (Fig. 1c). Signals for the lateral membrane-associating protein Discs large  
93 (Dlg)<sup>27</sup> at cell–cell boundaries were indistinguishable between wild-type cells and Pak3 RNAi  
94 clones, suggesting that Pak3 RNAi does not compromise the integrity of epithelial cells (Fig.

95 1c).

96

97 **Pak3 is required for cell–cell junction shortening.** To examine the role of Pak3 in cellular  
98 dynamics, we monitored the dynamics of cell–cell junctions labeled with GFP-tagged E-  
99 cadherin (E-Cad::GFP), an adhesive AJ component, during A8a cell movement<sup>28,29</sup>. In the  
100 control epithelia, we observed that cell–cell junctions undergo shortening, form four-way  
101 vertices, and subsequently grow in other directions, consistent with a previous report (Fig. 1d;  
102 Supplementary Movie 1)<sup>20</sup>. In the Pak3-depleted A8a cells, junctions frequently failed to  
103 complete shortening; that is, they did not shorten sufficiently to form four-way vertices and  
104 instead went back to the original direction (Fig. 1d; Supplementary Movie 2). To quantify these  
105 defective junction dynamics, we categorized the junctions in A8a cells according to their  
106 dynamics as follows: junctions that completed shortening and grew in other directions  
107 (remodeling), junctions that completed shortening, but failed to grow in other directions after  
108 forming four-way vertices (growth defect), junctions that shortened sufficiently to reach 1.5  
109  $\mu\text{m}$  in length, but failed to form four-way vertices (shortening defect), and junctions that did  
110 not shorten to less than 1.5  $\mu\text{m}$  in length (no remodeling) (Fig. 1e). Then, the populations of  
111 junctions in each category were examined. In the control cells, approximately 55% of junctions

112 underwent remodeling, and few junctions showed defects during a 4-h period following the  
113 initiation of A8a cell movement (from 26 to 30 h APF, Fig. 1f). By contrast, in Pak3 RNAi  
114 cells, the frequency of junction remodeling was decreased to < 10%, and instead, the number  
115 of shortening junctions that failed to form four-way vertices (categorized as a shortening  
116 defect) was significantly increased (Fig. 1f). Similar propensities were observed in the A8a  
117 cells of a Pak3 hypomorphic mutant (*Pak3<sup>d02472</sup>*)<sup>30</sup>, although the decline in remodeling  
118 frequency was not substantial compared to that in Pak3 RNAi cells (Fig. 1f). Meanwhile, the  
119 frequency of the growth defect was not altered in these Pak3 mutants (Fig. 1f). These results  
120 suggest that Pak3 is required for junction shortening during cell intercalation.

121

122 **Pak3 suppresses aberrant actin dynamics in response to junction contraction.** Junction  
123 shortening is driven by the contractile forces of actomyosin accumulating at the AJs of  
124 junctions, and Pak protein families are known to regulate actin dynamics<sup>5,31–33</sup>. These findings  
125 and our observations led us to speculate that Pak3 has roles in actin dynamics during junction  
126 shortening in the A8a epithelia. To test this possibility, we performed time-lapse imaging of  
127 GFP-tagged Lifeact (Lifeact::GFP), which labels F-actin<sup>34</sup>. In the control A8a cells, actin was  
128 distributed predominantly at cell–cell junctions (Fig. 2a; Supplementary Movie 3). Magnified



129 images showed that, whereas the majority of Lifeact::GFP signals were localized along  
130 junctions, actin frequently generated small protrusions arising from the junctions (Fig. 2b). The  
131 maximum size of these actin-positive protrusions was  $1.1 \pm 0.34 \mu\text{m}$  in height (perpendicular  
132 to the junctions) and  $2.1 \pm 1.1 \mu\text{m}$  in width (parallel to the junctions) (Fig. 2c). These  
133 observations suggest that actin not only merely forms into bundled structures along cell–cell  
134 junctions but also generates small protrusive structures in the A8a cells undergoing junction  
135 remodeling. In Pak3 RNAi cells, actin also localized to cell–cell junctions, but generated  
136 significantly larger protrusive structures, compared to those in the control cells (Fig. 2a–c;  
137 Supplementary Movie 4). Similar actin-positive structures were also observed in *Pak3*<sup>d02472</sup>  
138 flies with another actin-labeling probe, GFP-tagged actin-binding domain of utrophin  
139 (UtrABD::GFP) (Fig. 2d)<sup>35,36</sup>. To semi-quantify these actin dynamics in Pak3 RNAi cells, we  
140 defined a “large” actin protrusion as a Lifeact-positive cluster at junctions that was greater than  
141  $1.5 \mu\text{m}$  in height and greater than  $3 \mu\text{m}$  in width in a planar section; both lengths approximately  
142 exceeded the mean + 1 standard deviation (S.D.) of each length of the actin protrusions in the  
143 control cells, respectively (Fig. 2c,e). We then examined the frequency of the appearance of  
144 such large protrusions at each junction (Fig. 2f). While greater than 95% of cell–cell junctions  
145 in the control cells did not generate large protrusions, these structures emerged at almost all

146 junctions at least once per hour in Pak3 RNAi cells (Fig. 2f). Again, overexpressing Pak3  
147 partially alleviated the formation of large protrusions: although these structures were still  
148 observed in approximately 50% of junctions, they were absent from greater than 40% of  
149 junctions, and only a few junctions formed large protrusions more than three times per hour  
150 (Fig. 2f). These data suggest that Pak3 suppresses the formation of aberrant actin protrusions  
151 in the A8a cells.

152           Branched actin networks induce the formation of protrusive actin structures and are  
153 generated by the Arp2/3 complex, which is stimulated by the WAVE regulatory complex  
154 (WRC)<sup>1,3</sup>. To determine whether this pathway is involved in the formation of large protrusions,  
155 we used RNAi targeting *Abi*, a component of the WRC, in Pak3-depleted cells<sup>37,38</sup>. Depletion  
156 of *Abi* suppressed the generation of large actin protrusions, although it did not completely  
157 restore actin dynamics (Fig. 2f). This suggests that the aberrant actin protrusions are in part  
158 composed of branched actin-networks.

159           To further characterize these aberrant actin protrusions in Pak3 RNAi cells, we  
160 explored the correlation between their emergence and junction dynamics. In Pak3-depleted  
161 cells, junctions failed to undergo remodeling (Fig. 1f), but instead underwent repeated  
162 shrinkage and extension (Fig. 2g). We found that the generation of large protrusions was

163 initiated frequently when the junctions were shortening rather than when they were extending  
164 (Fig. 2g). Approximately 80% of the large actin protrusions emerged at shortening junctions  
165 (Fig. 2h). These observations raise the possibility that junction contraction sensitizes cells to  
166 the formation of large protrusions. To evaluate this possibility, we depleted MRLC or Rock,  
167 an upstream activator of myosin II<sup>1,5</sup>. Depletion of these factors suppressed the emergence of  
168 large protrusions in Pak3 RNAi cells (Fig. 2f). Collectively, these results suggest that Pak3  
169 suppresses the formation of branched network-containing actin protrusions at cell–cell  
170 junctions upon contraction of the junctions.

171

172 **Pak3 retains myosin II cables and tension at cell–cell junctions.** During the emergence of  
173 aberrant actin protrusions, the junctions failed to continue shortening and instead re-extended  
174 (Fig. 2g), implying that while large protrusions are induced upon junction contraction, they in  
175 turn perturb contraction. To understand how junction contraction is compromised, we  
176 examined the dynamics of myosin II. Time-lapse imaging of GFP-tagged MRLC  
177 (MRLC::GFP) showed that the majority of MRLC::GFP signals were observed as a single  
178 cable at cell–cell junctions (Fig. 3a). In the control cells, the MRLC::GFP signals still remained  
179 as a single cable at the initiation of junction shortening; however, when the junction lengths

180 were decreased, the MRLC::GFP signals split into two distinct cables at the shortening  
181 junctions (Fig. 3a, arrowheads). In Pak3-depleted cells, we found that the MRLC::GFP cables  
182 had already split before the junctions had shortened sufficiently (Fig. 3a, arrowheads).  
183 Measurement of the lengths of junctions when MRLC::GFP cables split revealed that depleting  
184 Pak3 significantly increased their length from  $1.3 \pm 0.41$  to  $2.2 \pm 0.72$   $\mu\text{m}$  (Fig. 3b). Since E-  
185 Cad::GFP signals did not segregate at shortening junctions (Fig. 1d), this observation suggests  
186 that myosin II is dissociated from shortening cell–cell junctions.

187           To examine the interplay between the large actin protrusions and myosin II cables in  
188 Pak3 RNAi cells, we next observed myosin II and actin dynamics simultaneously using  
189 MRLC::GFP and Lifeact tagged with red fluorescent protein (Lifeact::Ruby)<sup>34</sup>. We categorized  
190 the aberrant actin and myosin II dynamics into the following three groups and examined their  
191 proportions: splitting of myosin II cables, generation of large actin protrusions, and both (Fig.  
192 3c–e). At junctions greater than 3  $\mu\text{m}$  in length, which roughly exceed the mean + 1 S.D. of  
193 the length with split myosin II cables in Pak3-depleted cells (Fig. 3b), large protrusive  
194 structures were still generated in the absence of myosin II splitting, suggesting that the  
195 dissociation of myosin II from cell–cell junctions is not located upstream from the formation  
196 of aberrant actin protrusions (Fig. 3d). In contrast, at junctions less than 3  $\mu\text{m}$  in length (or

197 shortening junctions), most of the splitting cables were observed concomitantly with large actin  
198 protrusions (Fig. 3e). This observation raises the possibility that the emergence of large actin  
199 protrusions triggers the segregation of myosin II at shortening junctions. To test this possibility,  
200 we depleted *Abi* in *Pak3* RNAi cells. This manipulation reduced the length at which the  
201 junctions showed split myosin II cables, suggesting that myosin II dissociation is associated  
202 with the generation of aberrant actin protrusions (Fig. 3f,g).

203           We hypothesized that the failure of junction contraction observed in *Pak3*-depleted  
204 cells was attributed to the dissociation of myosin II from shortening junctions and the  
205 consequent reduction in tension at the junctions. To evaluate tension at junctions, we cut the  
206 junctions by ablation with a 365-nm laser and measured the displacement of their vertices,  
207 which reflects junctional tension (Fig. 3h,i)<sup>39,40</sup>. This showed that the initial speed of  
208 displacement upon laser ablation was decreased in *Pak3* RNAi cells (Fig. 3i). Collectively,  
209 these results suggest that *Pak3* ensures junction contraction by retaining myosin II attachment  
210 and tension at cell–cell junctions.

211

212 **Dilution of E-cadherin at cell–cell junctions mediates myosin II dissociation.** To clarify  
213 how the large actin protrusions and consequent segregation of myosin II at shortening junctions

214 are connected, we again explored the distribution of E-cadherin, since it is a central component  
215 of the cadherin–catenin core complex that acts as a scaffold for actomyosin at AJs<sup>29,41</sup>.  
216 Magnified time-lapse images of E-Cad::GFP in the control cells revealed that while the  
217 majority of E-Cad::GFP signals were localized along cell–cell junctions, they frequently  
218 formed small protrusions arising from the junctions (Fig. 4a, arrowheads; Supplementary  
219 Movie 5). These protrusions were positive for E-Cad::GFP and Lifeact::Ruby, suggesting that  
220 E-cadherin is associated with actin protrusions (Fig. 4b). We also found that E-Cad::GFP levels  
221 were sometimes decreased locally at the base of these protrusions on the junctions (Fig. 4a,  
222 broken line). These observations suggest that actin protrusions can reduce the local levels of  
223 junctional E-cadherin. The junctions in Pak3-depleted cells also generated E-Cad::GFP-  
224 positive protrusions, but they were larger in size (Fig. 4a, arrowheads; Supplementary Movie  
225 6). In addition, the local regions associated with E-Cad::GFP dilution on junctions were  
226 extended (Fig. 4a, broken lines). These observations suggest that Pak3 depletion enhances the  
227 reduction in E-cadherin levels at cell–cell junctions.

228 We then asked whether this dilution of E-cadherin is involved in the formation of  
229 aberrant actin protrusions and/or myosin II segregation. To this end, we upregulated E-cadherin  
230 levels in the Pak3-depleted A8a cells and examined if this manipulation suppressed these

231 dynamics. A comparison of E-Cad::GFP intensities at the local regions with and without actin  
232 protrusions ( $Int_{w/}$  and  $Int_{w/o}$ , respectively) within each junction in Pak3-depleted cells revealed  
233 that the levels of endogenous E-cadherin tagged with GFP (knock-in, KI) were significantly  
234 reduced to approximately 80% in the presence of actin protrusions (Fig. 4c–e). Overexpressing  
235 E-Cad::GFP under the control of the ubiquitin promoter, which slightly increased E-cadherin  
236 protein levels<sup>42</sup>, attenuated the local reduction in E-Cad::GFP levels upon the formation of  
237 actin protrusions (Fig. 4c,e). However, this manipulation did not attenuate the generation of  
238 large actin protrusions, indicating that E-cadherin dilution is located downstream from the  
239 formation of actin protrusions (Fig. 4f).

240 We next induced the overexpression of intact E-cadherin<sup>43</sup>. This manipulation  
241 suppressed the dissociation of myosin II from cell–cell junctions in Pak3 RNAi cells, which  
242 was indicated by a reduction in the length of junctions with split MRLC::GFP cables, similar  
243 to the effect of Abi RNAi (Figs. 3f,g and 4g,h). Taken together, these results suggest that the  
244 dilution of E-cadherin at cell–cell junctions induced by actin protrusions results in the inability  
245 of Pak3-depleted cells to retain myosin II at the junctions.

246

247 **E-cadherin maintains tissue dynamics.** We finally explored whether overexpressing E-

248 cadherin also restored tissue dynamics in Pak3 RNAi flies. E-Cad::GFP overexpression  
249 partially restored the junction-remodeling frequency in Pak3-depleted cells and slightly  
250 decreased the frequency of the shortening defect (Fig. 5a). In addition, this manipulation  
251 decreased the number of adult males with abnormal orientations of genitalia (Figs. 1b and 5b).  
252 These results suggest that the E-cadherin-mediated association of myosin II at junctions is  
253 required for completing junction shortening, leading to proper cell intercalation and epithelial  
254 cell movement.

255

## 256 **Discussion**

257 During cell–cell junction shortening, actin and myosin II accumulate at junctions, and the  
258 resultant actomyosin bundles generate contractile forces<sup>5,44</sup>. In contrast, previous reports  
259 demonstrated that myosin II contractility potentiates actin unbundling and depolymerization in  
260 vitro and in vivo<sup>45,46</sup>, which could compromise contraction. It has also been recently shown  
261 that cell–cell contacts concomitantly induce both myosin II-driven contraction and protrusive  
262 branched actin-mediated extension<sup>10</sup>. Therefore, it would be reasonable to suppose that there  
263 is a mechanism to maintain contractility for persistent cell–cell junction shortening. In this  
264 study, we found that, in the absence of Pak3, aberrant actin dynamics at junctions disturb



265 junction contraction during their shortening. On the basis of our results, we suppose the  
266 following scenario in cells lacking Pak3 (Fig. 5c): (i) upon contraction of cell–cell junctions,  
267 actin dynamics at the junctions are altered to generate abnormally large protrusions; (ii) these  
268 aberrant protrusions cause the dilution of E-cadherin at the junctions; (iii) the decrease in E-  
269 cadherin levels weakens the association of myosin II cables at the junctions; and (iv) the  
270 dissociation of myosin II cables causes insufficient transmission of their contractility to the  
271 junctions, leading to a decrease in junctional tension and incomplete junction shortening. In  
272 the normal condition (in the presence of Pak3), Pak3 blocks excess formation of actin  
273 protrusions, keeps E-cadherin and myosin II localized at junctions, and thus ensures persistent  
274 junction contraction, which is necessary for completing cell–cell junction remodeling and the  
275 resultant tissue movement (Fig. 5c).

276 This scenario proposes a possible negative feedback mechanism (Fig. 5c, green  
277 arrows); the contractile forces of myosin II at junctions drive junction shortening, but they can  
278 oppositely perturb shortening by concomitantly altering actin dynamics, such as inducing the  
279 formation of WRC-dependent branched actin networks. Since Pak proteins are reported to  
280 regulate actin dynamics<sup>47,48</sup>, Pak3 is a candidate for counteracting such undesirable actin  
281 dynamics, although its precise molecular mechanism is still unclear. Considering that Pak

282 proteins and the WRC are activated by Rho GTPases<sup>47,49,50</sup>, it is possible that the presence of  
283 Pak3 sequesters these GTPases from the branching network-forming machineries. In addition,  
284 since Pak proteins are involved in a diverse array of biological events and have various  
285 substrates<sup>31,51-54</sup>, the identification of Pak3 substrates in this context will further deepen our  
286 understanding of how cells accomplish persistent junctional dynamics.

287

## 288 **Methods**

289 **Fly genetics.** The following *Drosophila* stocks were used: *w<sup>1118</sup>*, *hs-flp*, *Act>CD2>Gal4*, *UAS-*  
290 *mCD8::mCherry*, *UAS-Lifeact::GFP*, *UAS-Lifeact::Ruby*, *His2Av::mRFP*, *UAS-Dicer2*, *UAS-*  
291 *MRLC (sqh) RNAi* (JF01103), and *UAS-Abi RNAi* (HMC03190) (Bloomington *Drosophila*  
292 Stock Center); *UAS-MRLC RNAi* (7916) and *UAS-Rock RNAi* (3793) (Vienna *Drosophila*  
293 Resource Center); *UAS-Pak3 RNAi* (14895R-1) (National Institute of Genetics, Japan); *UAS-*  
294 *E-cadherin* and *Ubi-E-cadherin::GFP* (*Drosophila* Genomics and Genetic Resources); *UAS-*  
295 *Pak3::GFP* (a gift from S. Hayashi); *AbdB-Gal4<sup>LDN</sup>* (ref. 24); *Pak3<sup>d02472</sup>* (ref. 30); *E-*  
296 *Cad::GFP<sup>28</sup>*; *sqh<sup>AX3</sup>;sqh-sqh::GFP* (MRLC::GFP)<sup>55</sup>; *sqh-UtrABD::GFP<sup>36</sup>*; and *UAS-*  
297 *Histone2B (H2B)::ECFP<sup>56</sup>*. The flies were raised, and all experiments were performed at 25°C.  
298 Somatic RNAi clones were induced using the FLP/FRT technique<sup>57</sup> in white pupae (at 0 h

299 APF) by heat shock (37°C for 15 min).

300 **Antibodies.** Antibodies against Dlg (4F3; Developmental Studies Hybridoma Bank) and  
301 Pak3<sup>58</sup> were used.

302 **Immunohistochemistry.** Pupae were dissected and fixed in 4% paraformaldehyde in  
303 phosphate-buffered saline (PBS) for 20 min at room temperature (RT) and permeabilized with  
304 0.1% Triton X-100 in PBS (PBT). The permeabilized samples were incubated in PBT with 5%  
305 donkey serum (blocking buffer) for 30 min at RT, incubated with primary antibodies in  
306 blocking buffer overnight at 4°C, washed with PBT, incubated in blocking buffer for 30 min  
307 at RT, and incubated with secondary antibodies (Alexa Fluor 647 goat anti-mouse IgG; Life  
308 Technologies) in blocking buffer for 2 h at RT. The samples were washed with PBT and  
309 mounted with 70% glycerol in PBS. Fluorescence microscopy images were captured on a TCS  
310 SP8 with a 63× numerical aperture (NA) 1.3 glycerol objective (Leica). Images are maximum  
311 intensity projections of serial optical sections taken at a 0.5-μm z step size.

312 **Live imaging.** Pupae were prepared as described previously<sup>21</sup>. Time-lapse imaging of flies was  
313 performed using an SP8 confocal microscope with 63× NA 1.3 glycerol and 20× NA 0.75 dry  
314 objectives (Leica), except for the images in Figs. 1D and 3A and Movies S1 and S2, which  
315 were obtained using an inverted microscope with a 60× NA 1.3 silicone oil objective

316 (Olympus) equipped with a spinning-disc confocal unit (CSU-W1; Yokogawa) and a Zyla 4.2  
317 PLUS sCMOS camera (Andor). All images are maximum intensity projections at the level of  
318 the AJs taken at a 1- $\mu\text{m}$  z step size, except for images showing rotation of the genitalia (Fig.  
319 1A), which are maximum intensity projections of the posterior end of flies taken at a 5- $\mu\text{m}$  z  
320 step size. Time-lapse images were acquired at 10-s, 20-s, 2-min, or 10-min intervals.

321 **Laser ablation.** Laser ablation was performed with a 365-nm MicroPoint laser (Andor). To  
322 cut junctions, a 365-nm laser pulse was applied for 1 iteration to the point at the middle of the  
323 targeted junctions at the level of AJs, which was determined by maximum E-Cad::GFP  
324 intensity.

325 **Tracking of junction dynamics.** Junction dynamics were analyzed manually with Fiji  
326 software. Projected time-lapse images were used. In the A8a epithelia, junctions were tracked  
327 from the initiation of movement (26 h APF) to the time when the genitalia angles were greater  
328 than  $90^\circ$  (30 h APF)<sup>21</sup>. Junctions that were remodeled at least once were categorized as  
329 “remodeling.” Junctions that failed to resolve four-way vertices were categorized as “growth  
330 defect.” Junctions that remodeled, but then immediately retracted the new junctions and re-  
331 formed in the original direction were also categorized as “growth defect.” Junctions that  
332 shortened to less than 1.5  $\mu\text{m}$  in length, but failed to form four-way vertices were categorized

333 as “shortening defect.” “No remodeling” included junctions that did not shorten to less than  
334 1.5  $\mu\text{m}$  in length.

335 **Quantification of junction length, fluorescence intensity, and actin dynamics.** Cell–cell

336 junction length was determined as the distance between vertices, except for when split

337 MRLC::GFP cables emerged, which was determined as the distance between myosin II cables

338 in cells surrounding the shortening junctions when the myosin II cables in cells forming the

339 shortening junctions first segregated. The mean fluorescence intensity of E-Cad::GFP at a

340 region on the junctions was measured using a line along the junctions. The frequency of the

341 emergence of large actin protrusions was counted at each junction within 1 h.

342 **Statistical analysis.** All statistical analyses were performed using R. To assess significance,

343 the following tests were used: two-way analysis of variance (ANOVA) followed by Tukey’s

344 test for comparing the percentage of remodeling junctions; two-way ANOVA followed by

345 Dunnett’s test for comparing junction length with split myosin II cables among Pak3 RNAi

346 cells; unpaired two-tailed *t*-test for comparing two samples; one-sample *t*-test for the

347 significance of the  $\text{Int}_w/\text{Int}_{w/o}$  ratio with test values of 1; and unpaired two-tailed Mann-

348 Whitney *U*-test followed by Bonferroni’s test for comparing the frequency of the appearance

349 of actin diffusive structures.

350

351 **Acknowledgements**

352 We thank S. Hayashi for providing the *UAS-Pak3::GFP* fly strain; N.T. Sherwood for  
353 providing the *Pak3<sup>d02472</sup>* fly strain; T. Lecuit for providing the *sqh-UtrABD::GFP* fly strain; N.  
354 Harden for providing the anti-Pak3 antibodies; E. Maekawa, A. Isomura and Y. Umegaki, S.  
355 Sato, K. Takahashi and A. Kuranaga for supporting the experiments; and members of the S.  
356 Hayashi, T. Nishimura, S. K. Yoo, Y.-C. Wang, and all member of our laboratory for  
357 discussions. We are grateful to “ThinkSCIENCE” for language proofreading of the manuscript.  
358 This work was supported by grants from JST CREST Grant Number JPMJCR1852, Japan  
359 (E.K.), the research grand for Astellas Foundation for Research on Metabolic Disorders (E.K.),  
360 the Takeda Science Foundation (E.K.), the Japan Foundation for Applied Enzymology (E.K.),  
361 MEXT KAKENHI grant number JP26114003 (E.K.), and JSPS KAKENHI grant numbers  
362 JP24687027 (E.K.), JP16H04800 (E.K.), and JP18K14691 (H.U).

363

364

365 **Author contributions**

366 H.U. conceived the study, performed the experiments, analyzed the data, and wrote the

367 manuscript. E.K. conceived the study, analyzed the data, and revised the manuscript.

368

### 369 **Competing interests**

370 The authors declare no competing interests.

371

### 372 **Materials and correspondence**

373 Further information and requests for resources and reagents should be directed to and will be

374 fulfilled by the corresponding author, Erina Kuranaga ([erina.kuranaga.d1@tohoku.ac.jp](mailto:erina.kuranaga.d1@tohoku.ac.jp)).

375

### 376 **REFERENCES**

377 1. Lecuit, T., Lenne, P.-F. & Munro, E. Force Generation, Transmission, and Integration

378 during Cell and Tissue Morphogenesis. *Annu. Rev. Cell Dev. Biol.* (2011).

379 doi:10.1146/annurev-cellbio-100109-104027

380 2. Murrell, M., Oakes, P. W., Lenz, M. & Gardel, M. L. Forcing cells into shape: The

381 mechanics of actomyosin contractility. *Nature Reviews Molecular Cell Biology* (2015).

382 doi:10.1038/nrm4012

383 3. Krause, M. & Gautreau, A. Steering cell migration: Lamellipodium dynamics and the

- 384 regulation of directional persistence. *Nature Reviews Molecular Cell Biology* (2014).  
385 doi:10.1038/nrm3861
- 386 4. Heisenberg, C.-P. & Bellaïche, Y. Forces in Tissue Morphogenesis and Patterning.  
387 *Cell* **153**, 948–962 (2013).
- 388 5. Levayer, R. & Lecuit, T. Biomechanical regulation of contractility: Spatial control and  
389 dynamics. *Trends in Cell Biology* **22**, 61–81 (2012).
- 390 6. Huse, M. Mechanical forces in the immune system. *Nat. Rev. Immunol.* **17**, 679–690  
391 (2017).
- 392 7. Pinheiro, D. & Bellaïche, Y. Mechanical Force-Driven Adherens Junction Remodeling  
393 and Epithelial Dynamics. *Dev. Cell* **47**, 3–19 (2018).
- 394 8. Mayor, R. & Etienne-Manneville, S. The front and rear of collective cell migration.  
395 *Nat. Rev. Mol. Cell Biol.* **17**, 97–109 (2016).
- 396 9. Ladoux, B., Mège, R. M. & Trepât, X. Front-Rear Polarization by Mechanical Cues:  
397 From Single Cells to Tissues. *Trends in Cell Biology* (2016).  
398 doi:10.1016/j.tcb.2016.02.002
- 399 10. Del Signore, S. J., Cilla, R. & Hatini, V. The WAVE Regulatory Complex and  
400 Branched F-Actin Counterbalance Contractile Force to Control Cell Shape and



- 401           Packing in the Drosophila Eye. *Dev. Cell* **44**, 471-483.e4 (2018).
- 402    11.   Walck-Shannon, E. & Hardin, J. Cell intercalation from top to bottom. *Nat. Rev. Mol.*  
403           *Cell Biol.* **15**, 34–48 (2014).
- 404    12.   Guillot, C. & Lecuit, T. Mechanics of epithelial tissue homeostasis and  
405           morphogenesis. *Science* **340**, 1185–1189 (2013).
- 406    13.   Irvine, K. D. & Wieschaus, E. Cell intercalation during Drosophila germband  
407           extension and its regulation by pair-rule segmentation genes. *Development* **120**, 827–  
408           841 (1994).
- 409    14.   Guirao, B. & Bellaïche, Y. Biomechanics of cell rearrangements in Drosophila.  
410           *Current Opinion in Cell Biology* **48**, 113–124 (2017).
- 411    15.   Bertet, C., Sulak, L. & Lecuit, T. Myosin-dependent junction remodelling controls  
412           planar cell intercalation and axis elongation. *Nature* **429**, 667–71 (2004).
- 413    16.   Martin, A. C. Pulsation and stabilization: Contractile forces that underlie  
414           morphogenesis. *Developmental Biology* (2010). doi:10.1016/j.ydbio.2009.10.031
- 415    17.   Fernandez-Gonzalez, R., Simoes, S. de M., Röper, J.-C., Eaton, S. & Zallen, J. A.  
416           Myosin II Dynamics Are Regulated by Tension in Intercalating Cells. *Dev. Cell* **17**,  
417           736–743 (2009).

- 418 18. Simões, S. de M. *et al.* Rho-Kinase Directs Bazooka/Par-3 Planar Polarity during  
419 *Drosophila* Axis Elongation. *Dev. Cell* **19**, 377–388 (2010).
- 420 19. Zallen, J. A. & Wieschaus, E. Patterned Gene Expression Directs Bipolar Planar  
421 Polarity in *Drosophila*. *Dev. Cell* **6**, 343–355 (2004).
- 422 20. Sato, K. *et al.* Left–right asymmetric cell intercalation drives directional collective cell  
423 movement in epithelial morphogenesis. *Nat. Commun.* **6**, 10074 (2015).
- 424 21. Kuranaga, E. *et al.* Apoptosis controls the speed of looping morphogenesis in  
425 *Drosophila* male terminalia. *Development* **138**, 1493–1499 (2011).
- 426 22. Suzanne, M. *et al.* Coupling of apoptosis and L/R patterning controls stepwise organ  
427 looping. *Curr. Biol.* **20**, 1773–1778 (2010).
- 428 23. Sato, K., Hiraiwa, T. & Shibata, T. Cell Chirality Induces Collective Cell Migration in  
429 Epithelial Sheets. *Phys. Rev. Lett.* **115**, (2015).
- 430 24. de Navas, L., Foronda, D., Suzanne, M. & Sánchez-Herrero, E. A simple and efficient  
431 method to identify replacements of P-lacZ by P-Gal4 lines allows obtaining Gal4  
432 insertions in the bithorax complex of *Drosophila*. *Mech. Dev.* **123**, 860–867 (2006).
- 433 25. Brand, A. H. & Perrimon, N. Targeted gene expression as a means of altering cell fates  
434 and generating dominant phenotypes. *Development* **118**, 401–415 (1993).

- 435 26. Dietzl, G. *et al.* A genome-wide transgenic RNAi library for conditional gene  
436 inactivation in *Drosophila*. *Nature* **448**, 151–156 (2007).
- 437 27. Macara, I. G. Parsing the polarity code. *Nature Reviews Molecular Cell Biology*  
438 (2004). doi:10.1038/nrm1332
- 439 28. Huang, J., Zhou, W., Dong, W., Watson, A. M. & Hong, Y. From the Cover: Directed,  
440 efficient, and versatile modifications of the *Drosophila* genome by genomic  
441 engineering. *Proc. Natl. Acad. Sci. U. S. A.* **106**, 8284–9 (2009).
- 442 29. Takeichi, M. Dynamic contacts: Rearranging adherens junctions to drive epithelial  
443 remodelling. *Nature Reviews Molecular Cell Biology* **15**, 397–410 (2014).
- 444 30. Ozdowski, E. F., Gayle, S., Bao, H., Zhang, B. & Sherwood, N. T. Loss of *Drosophila*  
445 melanogaster p21-activated kinase 3 suppresses defects in synapse structure and  
446 function caused by spastin mutations. *Genetics* (2011).  
447 doi:10.1534/genetics.111.130831
- 448 31. Bokoch, G. M. Biology of the p21-Activated Kinases. *Annu. Rev. Biochem.* (2003).  
449 doi:10.1146/annurev.biochem.72.121801.161742
- 450 32. Hofmann, C. The genetics of Pak. *J. Cell Sci.* (2004). doi:10.1242/jcs.01392
- 451 33. Mentzel, B. & Raabe, T. Phylogenetic and structural analysis of the *Drosophila*

- 452 melanogaster p21-activated kinase DmPAK3. *Gene* (2005).
- 453 doi:10.1016/j.gene.2004.12.030
- 454 34. Riedl, J. *et al.* Lifeact: A versatile marker to visualize F-actin. *Nat. Methods* (2008).
- 455 doi:10.1038/nmeth.1220
- 456 35. Burkel, B. M., Von Dassow, G. & Bement, W. M. Versatile fluorescent probes for
- 457 actin filaments based on the actin-binding domain of utrophin. *Cell Motil.*
- 458 *Cytoskeleton* (2007). doi:10.1002/cm.20226
- 459 36. Rauzi, M., Lenne, P.-F. & Lecuit, T. Planar polarized actomyosin contractile flows
- 460 control epithelial junction remodelling. *Nature* **468**, 1110–1114 (2010).
- 461 37. Eden, S., Rohatgi, R., Podtelejnikov, A. V., Mann, M. & Kirschner, M. W. Mechanism
- 462 of regulation of WAVE1-induced actin nucleation by Rac1 and Nck. *Nature* (2002).
- 463 doi:10.1038/nature00859
- 464 38. Chen, B. *et al.* The WAVE regulatory complex links diverse receptors to the actin
- 465 cytoskeleton. *Cell* **156**, 195–207 (2014).
- 466 39. Rauzi, M., Verant, P., Lecuit, T. & Lenne, P.-F. Nature and anisotropy of cortical
- 467 forces orienting *Drosophila* tissue morphogenesis. *Nat. Cell Biol.* **10**, 1401–1410
- 468 (2008).

- 469 40. Umetsu, D. *et al.* Local Increases in Mechanical Tension Shape Compartment  
470 Boundaries by Biasing Cell Intercalations. *Curr. Biol.* **24**, 1798–1805 (2014).
- 471 41. Lecuit, T. & Yap, A. S. E-cadherin junctions as active mechanical integrators in tissue  
472 dynamics. *Nature Cell Biology* **17**, 533–539 (2015).
- 473 42. Oda, H. & Tsukita, S. Real-time imaging of cell-cell adherens junctions reveals that  
474 *Drosophila* mesoderm invagination begins with two phases of apical constriction of  
475 cells. *J. Cell Sci.* **114**, 493–501 (2001).
- 476 43. Oda, H. & Tsukita, S. Nonchordate Classic Cadherins Have a Structurally and  
477 Functionally Unique Domain That Is Absent from Chordate Classic Cadherins. *Dev.*  
478 *Biol.* **216**, 406–422 (1999).
- 479 44. Martin, A. C. & Goldstein, B. Apical constriction: themes and variations on a cellular  
480 mechanism driving morphogenesis. *Development* (2014). doi:10.1242/dev.102228
- 481 45. Medeiros, N. A., Burnette, D. T. & Forscher, P. Myosin II functions in actin-bundle  
482 turnover in neuronal growth cones. *Nat. Cell Biol.* (2006). doi:10.1038/ncb1367
- 483 46. Haviv, L., Gillo, D., Backouche, F. & Bernheim-Groswasser, A. A Cytoskeletal  
484 Demolition Worker: Myosin II Acts as an Actin Depolymerization Agent. *J. Mol. Biol.*  
485 (2008). doi:10.1016/j.jmb.2007.09.066

- 486 47. Ridley, A. J. Rho GTPases and actin dynamics in membrane protrusions and vesicle  
487 trafficking. *Trends in Cell Biology* (2006). doi:10.1016/j.tcb.2006.08.006
- 488 48. Dráber, P., Sulimenko, V. & Dráberová, E. Cytoskeleton in mast cell signaling.  
489 *Frontiers in Immunology* (2012). doi:10.3389/fimmu.2012.00130
- 490 49. Heasman, S. J. & Ridley, A. J. Mammalian Rho GTPases: new insights into their  
491 functions from in vivo studies. *Nat. Rev. Mol. Cell Biol.* **9**, 690–701 (2008).
- 492 50. Ridley, A. J. Rho GTPases and cell migration. *J. Cell Sci.* (2001).
- 493 51. Radu, M., Semenova, G., Kosoff, R. & Chernoff, J. PAK signalling during the  
494 development and progression of cancer. *Nature Reviews Cancer* (2014).  
495 doi:10.1038/nrc3645
- 496 52. Duan, R. *et al.* Group I PAKs function downstream of Rac to promote podosome  
497 invasion during myoblast fusion in vivo. *J. Cell Biol.* (2012).  
498 doi:10.1083/jcb.201204065
- 499 53. Kamiyama, D. *et al.* Specification of Dendritogenesis Site in Drosophila aCC  
500 Motoneuron by Membrane Enrichment of Pak1 through Dscam1. *Dev. Cell* (2015).  
501 doi:10.1016/j.devcel.2015.09.007
- 502 54. Chiang, Y. -t. A. & Jin, T. p21-Activated protein kinases and their emerging roles in

- 503 glucose homeostasis. *AJP Endocrinol. Metab.* (2014).
- 504 doi:10.1152/ajpendo.00506.2013
- 505 55. Royou, A., Sullivan, W. & Karess, R. Cortical recruitment of nonmuscle myosin II in  
506 early syncytial *Drosophila* embryos: Its role in nuclear axial expansion and its  
507 regulation by Cdc2 activity. *J. Cell Biol.* **158**, 127–137 (2002).
- 508 56. Koto, A., Kuranaga, E. & Miura, M. Temporal regulation of *Drosophila* IAP1  
509 determines caspase functions in sensory organ development. *J. Cell Biol.* **187**, 219–  
510 231 (2009).
- 511 57. Xu, T. & Rubin, G. M. Analysis of genetic mosaics in developing and adult  
512 *Drosophila* tissues. *Development* **117**, 1223–1237 (1993).
- 513 58. Bahri, S. *et al.* The leading edge during dorsal closure as a model for epithelial  
514 plasticity: Pak is required for recruitment of the Scribble complex and septate junction  
515 formation. *Development* (2010). doi:10.1242/dev.045088

516

517

## 518 **Figure Legends**

519 **Figure 1 | Pak3 is required for cell–cell junction shortening during epithelial junction**

520 **remodeling.** (a) Representative time-lapse images of male genitalia observed from the  
521 posterior end during rotation. The ventral side is located at the top. Nuclei in the A8a cells and  
522 the whole body are depicted in green and purple, respectively. Yellow and white arrows  
523 indicate the movements of genitalia and the A8a epithelia, respectively. Scale bar, 100  $\mu\text{m}$ . (b)  
524 Left, schema for the categorization of genitalia angles. Yellow arrow indicates genitalia  
525 movement. Gray indicates the 360° rotation of genitalia (normal orientation). Right,  
526 percentages of male adult flies with the indicated genitalia angles are shown. Parentheses  
527 indicate the number of males examined. (c) A8a epithelia at 28 h APF immunostained for Pak3  
528 and Dlg. Pak3 RNAi cells are indicated with mCherry signals. Scale bar, 10  $\mu\text{m}$ . Broken lines  
529 indicate the edges of Pak3 RNAi clones. (d) Representative time-lapse images of E-Cad::GFP  
530 at remodeling junctions. Stars and triangles indicate cells forming the shortening junctions.  
531 Orange, blue, and green arrowheads indicate shortening junctions, four-way vertices, and  
532 growing junctions, respectively. Scale bar, 5  $\mu\text{m}$ . (e) Schema representing the categorization  
533 of junction dynamics. (f) Mean  $\pm$  S.D. of the percentages of junctions with the categorized  
534 dynamics. Bar colors correspond to (e). Parentheses indicate the number of examined junctions  
535 from 3 pupae per genotype. *P*-values by Tukey's test. Genotypes: (a)  
536  $+/Y;His2Av::mRFP/+;AbdB-Gal4$ ,  $UAS-H2B::ECFP/+$  (Control) and



537 +/Y;*His2Av::mRFP*/+;*AbdB-Gal4*, *UAS-H2B::ECFP/UAS-Pak3 RNAi*; (b) +/Y;;*AbdB-*  
538 *Gal4*/+ (Control), +/Y;;*AbdB-Gal4/UAS-MRLC RNAi*, +/Y;;*AbdB-Gal4/UAS-Pak3 RNAi*,  
539 +/Y;*UAS-Dicer2*/+;*AbdB-Gal4/UAS-Pak3 RNAi*, and +/Y;;*AbdB-Gal4*, *UAS-*  
540 *Pak3::GFP/UAS-Pak3 RNAi*; (c) *hs-flp/Y;E-Cad::GFP;Act>CD2>Gal4*, *UAS-*  
541 *mCD8::mCherry/UAS-Pak3 RNAi*; (d and f) +/Y;*E-Cad::GFP;AbdB-Gal4*, *UAS-*  
542 *H2B::ECFP*/+ (Control), +/Y;*E-Cad::GFP;AbdB-Gal4*, *UAS-H2B::ECFP/UAS-Pak3 RNAi*,  
543 and +/Y;*E-Cad::GFP;Pak3<sup>d02472</sup>*.

544 **Figure 2 | Pak3 depletion enhances the formation of large actin protrusions.** (a) Images of  
545 actin labeled with *Lifeact::GFP* in the A8a cells. Arrowheads indicate some actin protrusions.  
546 Scale bar, 10  $\mu$ m. (b) Magnified time-lapse images of *Lifeact::GFP* at cell–cell junctions. Scale  
547 bar, 3  $\mu$ m. (c) Mean  $\pm$  S.D. of the width and height of actin protrusion. Parentheses indicate  
548 the number of examined protrusions from 5 pupae per genotype. *P*-values by unpaired *t*-test.  
549 (d) Images of actin labeled with *UtrABD::GFP* in the A8a cells. Arrowheads indicate some  
550 actin protrusions. Scale bar, 10  $\mu$ m. (e) Schema of large actin (magenta) protrusions at a  
551 boundary (black). (f) Percentages of junctions generating large actin protrusions for the  
552 indicated number of times per hour are shown. Parentheses indicate the number of examined  
553 junctions from 4–5 pupae per genotype. *P*-values by Mann-Whitney *U*-test. (g) Graph showing

554 the length of a representative junction that repeats shortening and re-extension. The timings  
555 when large actin protrusions emerge are shown in magenta. **(h)** Mean  $\pm$  S.D. of the timing of  
556 the onset of large actin protrusion formation. Parenthesis indicates the number of protrusions  
557 from 15 junctions of 3 pupae. Genotypes: **(a-c)**  $+/Y;UAS-Lifeact::GFP/+;AbdB-Gal4/+$   
558 (Control) and  $+/Y;UAS-Lifeact::GFP/+;AbdB-Gal4/UAS-Pak3$  RNAi; **(d)**  $+/Y;sqh-$   
559  $UtrABD::GFP/+$  (Control) and  $+/Y;sqh-UtrABD::GFP/+;Pak3^{d02472}$ ; **(f)**  $+/Y;UAS-$   
560  $Lifeact::GFP/+;AbdB-Gal4/+$  (Control),  $+/Y;UAS-Lifeact::GFP/+;AbdB-Gal4/UAS-Pak3$   
561 RNAi,  $+/Y;UAS-Lifeact::GFP/+;AbdB-Gal4, UAS-Pak3::GFP/UAS-Pak3$  RNAi,  $+/Y;UAS-$   
562  $Lifeact::GFP/UAS-Abi$  RNAi;  $AbdB-Gal4/UAS-Pak3$  RNAi,  $+/Y;UAS-Lifeact::GFP/UAS-$   
563  $MRLC$  RNAi;  $AbdB-Gal4/UAS-Pak3$  RNAi, and  $+/Y;UAS-Lifeact::GFP/UAS-Rock$   
564 RNAi;  $AbdB-Gal4/UAS-Pak3$  RNAi; **(g and h)**  $+/Y;UAS-Lifeact::GFP/+;AbdB-Gal4/UAS-$   
565  $Pak3$  RNAi.

566 **Figure 3 | Pak3 depletion causes the dissociation of myosin II and reduces tension at**  
567 **junctions.** **(a)** Time-lapse images of MRLC::GFP at shortening junctions. Stars and triangles  
568 indicate cells forming the shortening junctions. Orange arrowheads indicate splitting myosin  
569 II cables. Scale bar, 3  $\mu$ m. **(b)** Mean  $\pm$  S.D. of the lengths of junctions with split myosin II  
570 cables; 30 junctions from 3 (Control) and 4 (Pak3 RNAi) pupae were examined. *P*-value by

571 unpaired *t*-test. **(c)** Representative images of cell–cell junctions with split myosin II cables,  
572 large actin protrusions, and both (from the left). Scale bar, 5  $\mu$ m. **(d and e)** Mean  $\pm$  S.D. of the  
573 percentages of aberrant actin and myosin II dynamics as categorized in **(c)** at cell–cell junctions  
574 larger than **(d)** and smaller than **(e)** 3  $\mu$ m. Parentheses indicate the number of examined  
575 junctions from 3 pupae. **(f)** Representative images of split MRLC::GFP cables (orange  
576 arrowheads) at junctions. Scale bar, 5  $\mu$ m. **(g)** Mean  $\pm$  S.D. of the lengths of junctions with  
577 split myosin II cables. Parentheses indicate the number of examined junctions from 5 (Pak3  
578 RNAi) and 6 (Pak3 and Abi RNAis) pupae. *P*-value by Dunnett’s test. **(h)** Kymographs of cell–  
579 cell junctions labeled with E-Cad::GFP and ablated with a 365-nm laser at *t* = 0. **(i)** Mean  $\pm$   
580 S.D. of the initial speed of vertex displacement after ablation; 32 junctions from 9 (Control)  
581 and 8 (Pak3 RNAi) pupae were examined. *P*-value by unpaired *t*-test. Genotypes: **(a and b)**  
582 *MRLC<sup>AX3</sup>/Y;MRLC-MRLC::GFP;AbdB-Gal4, UAS-H2B::ECFP/+* (Control) and  
583 *MRLC<sup>AX3</sup>/Y;MRLC-MRLC::GFP;AbdB-Gal4, UAS-H2B::ECFP/UAS-Pak3 RNAi*; **(c–e)**  
584 *MRLC<sup>AX3</sup>/Y;MRLC-MRLC::GFP/UAS-Lifeact::Ruby;AbdB-Gal4, UAS-H2B::ECFP/UAS-*  
585 *Pak3 RNAi*; **(f and g)** *MRLC<sup>AX3</sup>/Y;MRLC-MRLC::GFP/+;AbdB-Gal4, UAS-H2B::ECFP/UAS-*  
586 *Pak3 RNAi* and *MRLC<sup>AX3</sup>/Y;MRLC-MRLC::GFP/UAS-Abi RNAi;AbdB-Gal4, UAS-*  
587 *H2B::ECFP/UAS-Pak3 RNAi*; **(h and i)** *+/Y;E-Cad::GFP;AbdB-Gal4, UAS-H2B::ECFP/+*

588 (Control) and  $+Y;E-Cad::GFP;AbdB-Gal4, UAS-H2B::ECFP/UAS-Pak3 RNAi$ .

589 **Figure 4 | Reduction of E-cadherin levels at junctions induces myosin II dissociation. (a)**

590 Magnified time-lapse images of E-Cad::GFP at junctions. Arrowheads indicate E-Cad::GFP-

591 positive protrusions, and broken lines indicate the local decrease in E-Cad::GFP levels at the

592 bases of the protrusions. Scale bar, 3  $\mu\text{m}$ . **(b and c)** Images of junctions with E-Cad::GFP and

593 Lifeact::Ruby in control (b) and Pak3 RNAi (c) cells. Arrowheads indicate E-Cad::GFP and

594 Lifeact::Ruby double-positive protrusions. Scale bar, 2 (b) and 3 (c)  $\mu\text{m}$ . **(d)** Schema of E-

595 Cad::GFP intensities at local areas on the junctions with ( $\text{Int}_{w/}$ ) and without ( $\text{Int}_{w/o}$ ) large actin

596 (magenta) protrusions. **(e)** Mean  $\pm$  S.D. of the ratio of  $\text{Int}_{w/}$  and  $\text{Int}_{w/o}$  per junction. Parentheses

597 indicate the number of examined junctions from 4 (Pak3 RNAi) and 3 (Pak3 RNAi and E-

598 Cad::GFP overexpression) pupae. *P*-value by unpaired *t*-test. **(f)** Percentages of junctions

599 forming large actin protrusions for the indicated number of times per hour are shown.

600 Parentheses indicate the number of examined junctions from 4 pupae per genotype. *P*-values

601 by Mann-Whitney *U*-test. **(g)** Representative images of split MRLC::GFP cables (orange

602 arrowheads) at junctions. Scale bar, 5  $\mu\text{m}$ . **(h)** Mean  $\pm$  S.D. of the lengths of junctions with

603 split myosin II cables. The Pak3 RNAi data (left) are the same as in Fig. 3g. Parenthesis

604 indicates the number of examined junctions from 6 pupae. *P*-value by Dunnett's test.

605 Genotypes: **(a)** *+Y;E-Cad::GFP;AbdB-Gal4, UAS-H2B::ECFP/+* (Control) and *+Y;E-*  
606 *Cad::GFP;AbdB-Gal4, UAS-H2B::ECFP/UAS-Pak3 RNAi*; **(b)** *+Y;E-Cad::GFP/UAS-*  
607 *LifeAct::Ruby;AbdB-Gal4/+*; **(c and e)** *+Y;E-Cad::GFP/UAS-Lifeact::Ruby;AbdB-*  
608 *Gal4/UAS-Pak3 RNAi* and *+Y;Ubi-E-Cad::GFP/UAS-Lifeact::Ruby;AbdB-Gal4/UAS-Pak3*  
609 *RNAi*; **(f)** *+Y; UAS-Lifeact::Ruby/+;AbdB-Gal4/UAS-Pak3 RNAi* and *+Y; UAS-*  
610 *Lifeact::Ruby/Ubi-E-Cad::GFP;AbdB-Gal4/UAS-Pak3 RNAi*; **(g and h)** *MRLC<sup>AX3</sup>/Y;MRLC-*  
611 *MRLC::GFP/UAS-E-cadherin;AbdB-Gal4, UAS-H2B::ECFP/UAS-Pak3 RNAi*.

612 **Figure 5 | E-cadherin overexpression rescues tissue dynamics.** **(a)** Mean  $\pm$  S.D. of the  
613 percentages of junctions with the categorized dynamics. Bar colors correspond to Fig. 1e. The  
614 Pak3 RNAi data (left) are the same as in Fig. 1f. Parenthesis indicates the number of examined  
615 junctions from 3 pupae per genotype. *P*-values by Tukey's test. **(b)** Percentages of male adult  
616 flies with genitalia angles indicated in Fig. 1b are shown. Parenthesis indicates the number of  
617 males examined. **(c)** Schema of Pak3-dependent junction contraction. (i)–(iv) indicate the  
618 negative feedback mechanism (green arrows, described in the Discussion section). Genotypes:  
619 **(a)** *+Y;Ubi-E-Cad::GFP/E-Cad::GFP;AbdB-Gal4, UAS-H2B::ECFP/UAS-Pak3 RNAi*; **(b)**  
620 *+Y;Ubi-E-Cad::GFP/+;AbdB-Gal4, UAS-H2B::ECFP/UAS-Pak3 RNAi*.

621 **Supplementary Movie 1.** Dynamics of cell–cell junctions during the movement of control

622 A8a cells. E-cadherin was visualized with E-Cad::GFP. Scale bar, 10  $\mu$ m. Genotype, +/Y;E-

623 *Cad::GFP;AbdB-Gal4, UAS-H2B::ECFP/+*.

624 **Supplementary Movie 2.** Dynamics of cell–cell junctions during the movement of Pak3 RNAi

625 A8a cells. E-cadherin was visualized with E-Cad::GFP. Scale bar, 10  $\mu$ m. Genotype, +/Y;E-

626 *Cad::GFP;AbdB-Gal4, UAS-H2B::ECFP/UAS-Pak3 RNAi*.

627 **Supplementary Movie 3.** Dynamics of actin at cell–cell junctions in the control A8a cells.

628 Actin was visualized with Lifeact::GFP. Scale bar, 10  $\mu$ m. Genotype, +/Y;UAS-

629 *Lifeact::GFP;AbdB-Gal4/+*.

630 **Supplementary Movie 4.** Dynamics of actin at cell–cell junctions in the Pak3 RNAi A8a cells.

631 Actin was visualized with Lifeact::GFP. Scale bar, 10  $\mu$ m. Genotype, +/Y;UAS-

632 *Lifeact::GFP;AbdB-Gal4/UAS-Pak3 RNAi*.

633 **Supplementary Movie 5.** Dynamics of E-Cad::GFP at cell–cell junctions in the control A8a

634 cells. Scale bar, 3  $\mu$ m. Genotype, +/Y;E-Cad::GFP;AbdB-Gal4, UAS-H2B::ECFP/+.

635 **Supplementary Movie 6.** Dynamics of E-Cad::GFP at cell–cell junctions in Pak3 RNAi A8a

636 cells. Scale bar, 3  $\mu$ m. Genotype, +/Y;E-Cad::GFP;AbdB-Gal4, UAS-H2B::ECFP/UAS-Pak3

637 *RNAi*.

638

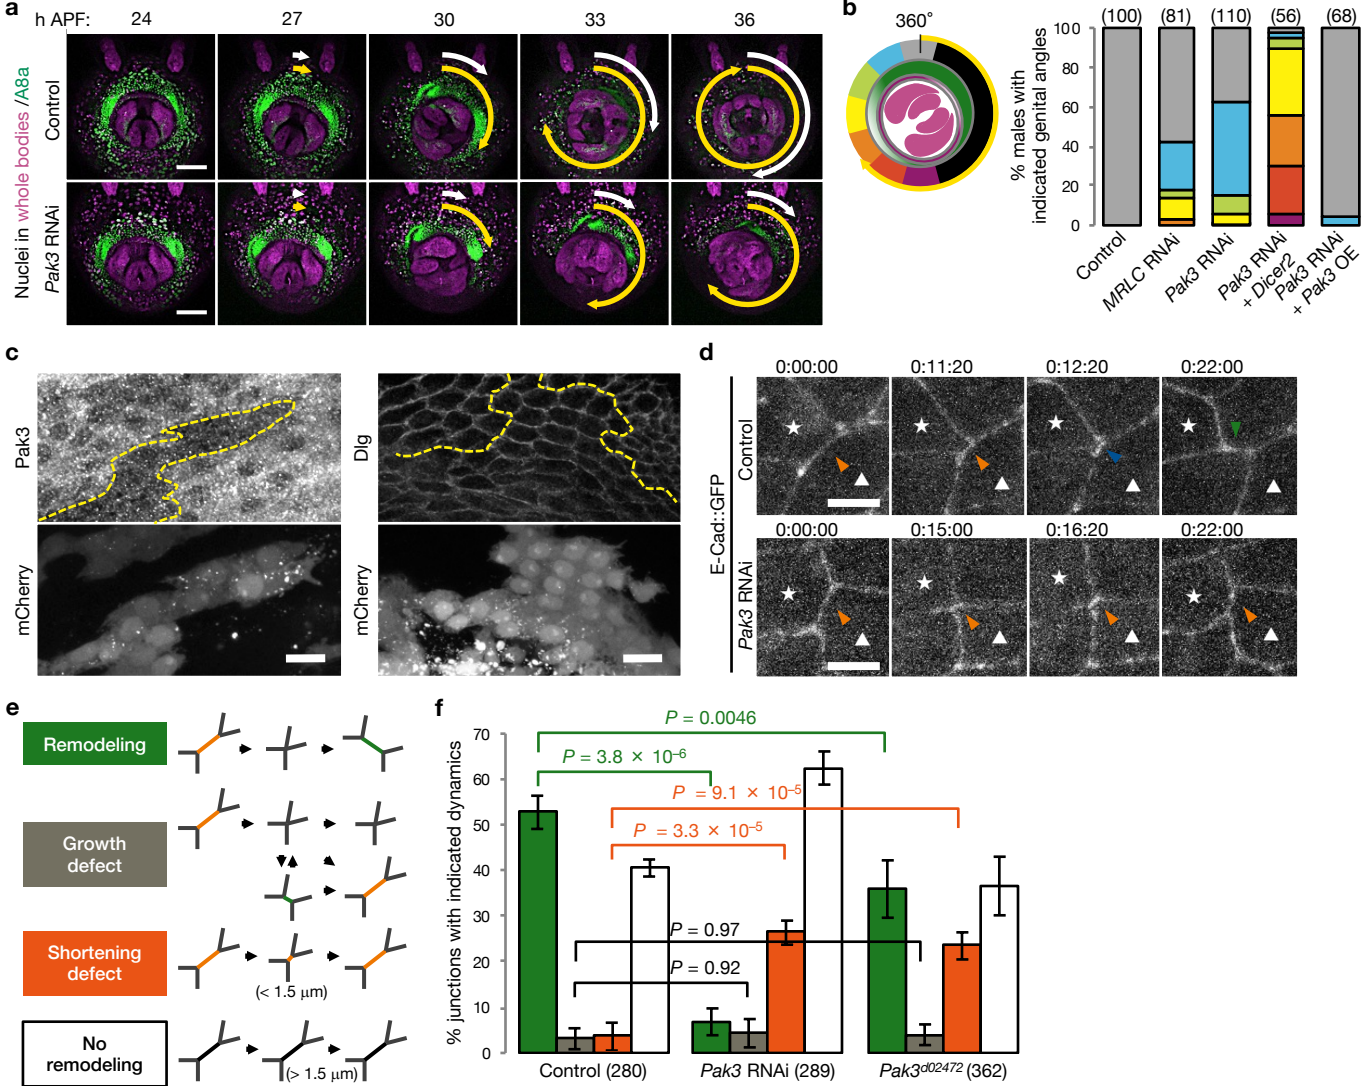

Figure 1

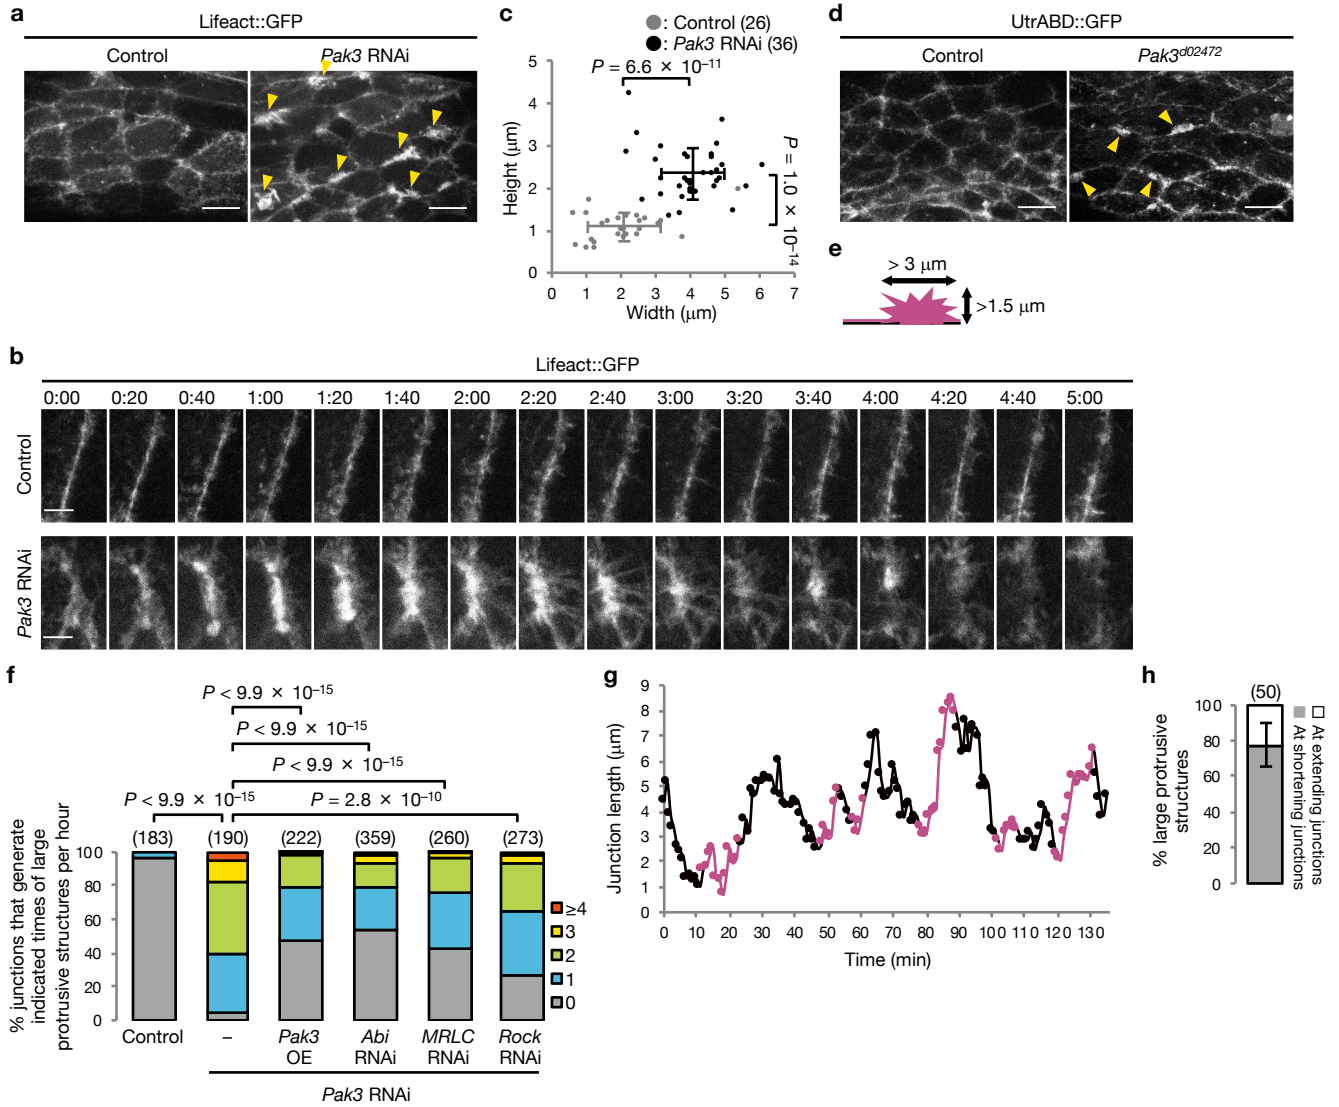

Figure 2



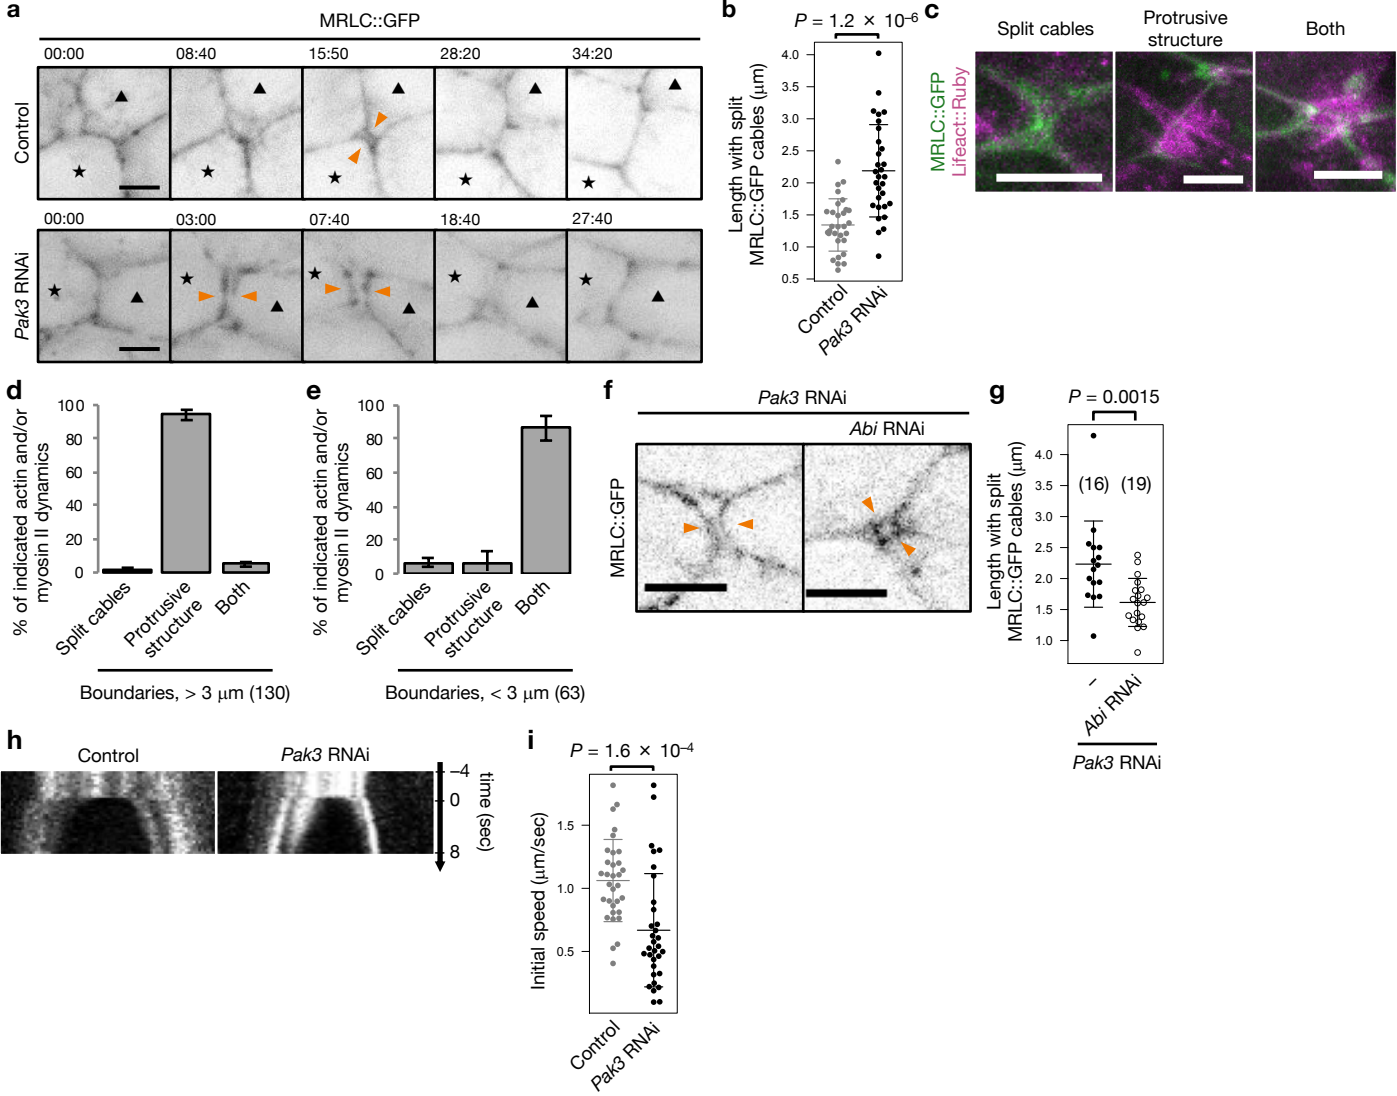

Figure 3

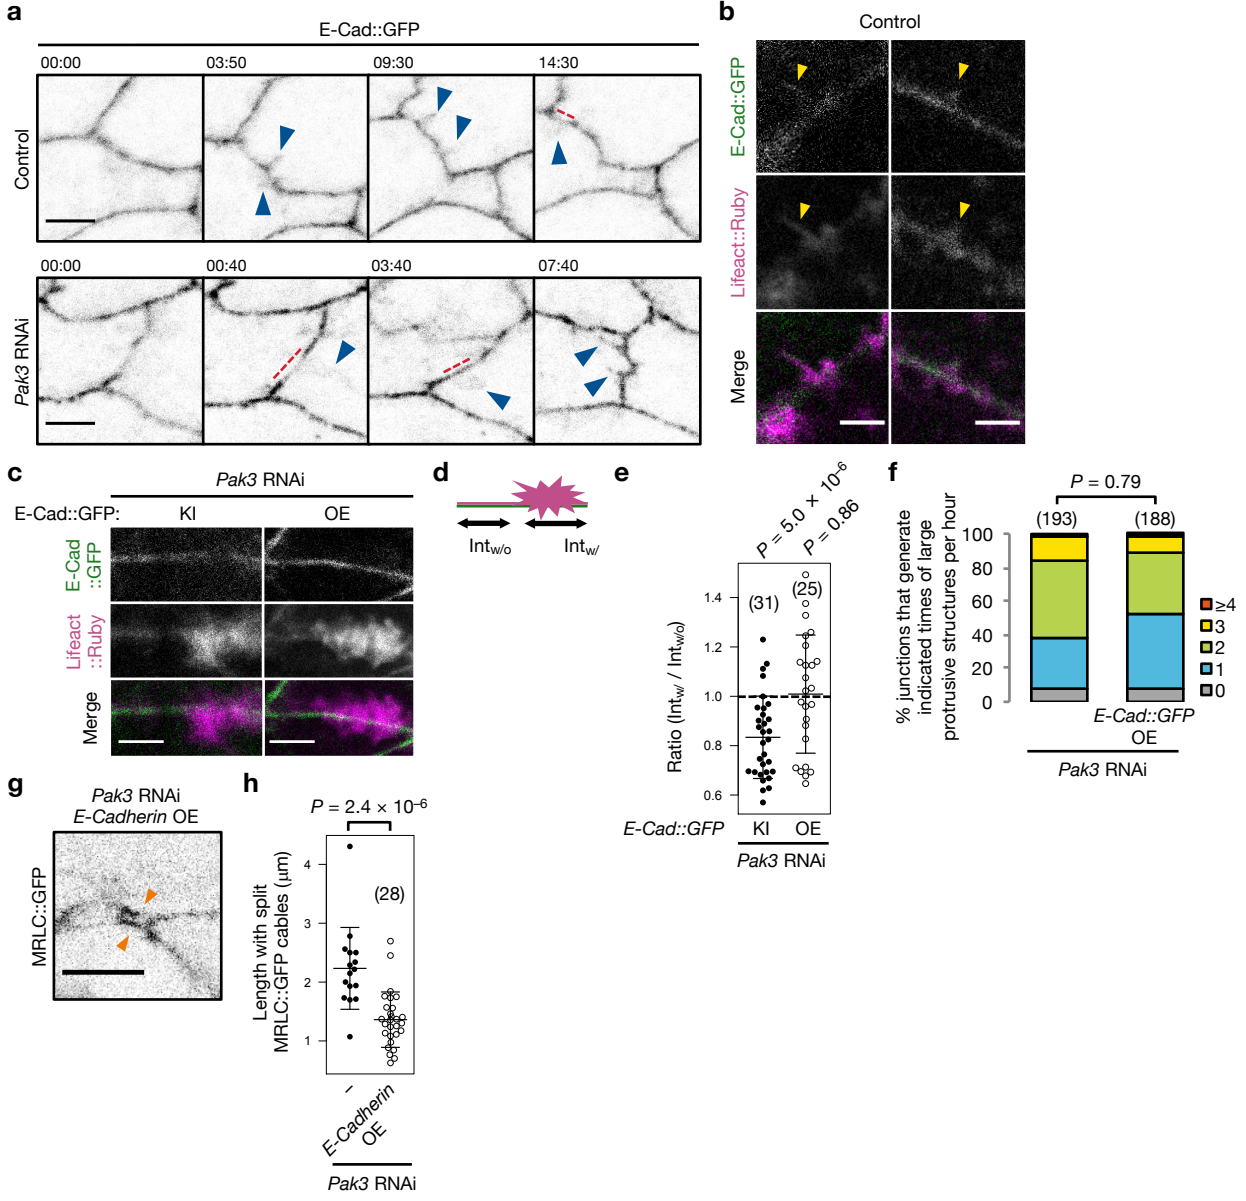

Figure 4

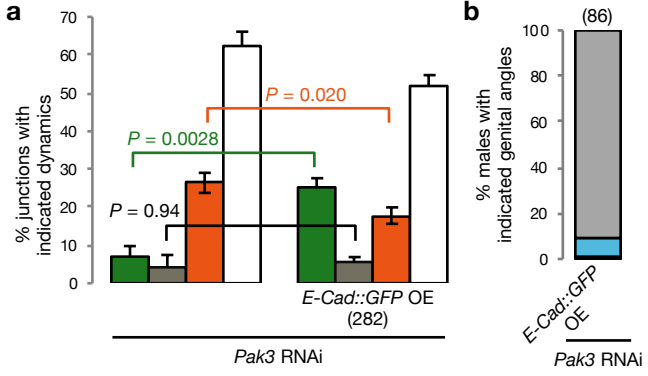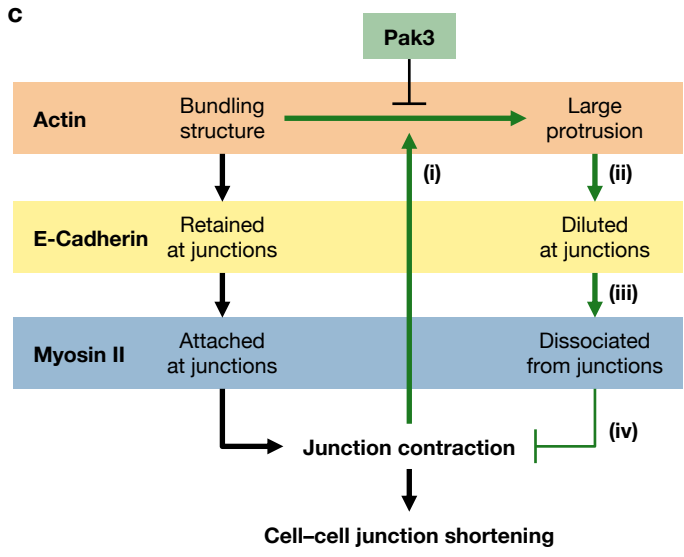

Figure 5
